# Supplementary material
Source: Springer Nature journal article supplement (https://www.springermedizin.de/resource/supplementary/12991_2009_1026_MOESM1_ESM.pdf/9615608)

# Drug Therapy for Schizophrenia

Kramer, 2007 &  
most drug trials

Kozma, 2008

Janicak, 2008

**Symptoms**  
(PANSS, and  
other symptom  
measures)

Cougnard, 2007  
Dirani, 2008

Yung, 2004  
Yung, 2005  
Schafer, 2007

**Functional  
Status**  
(PSP, ADLs, work  
productivity,  
school  
performance)

**Hospitalization**  
(an important  
component of  
total health care  
costs)

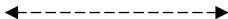

Supplement: MOESM1 [file 9615608]
